# Supplementary figures and images for: On the unique temperature-dependent interplay of a B-exciton and its trion in monolayer MoSe2
Source: Royal Society of Chemistry journal article supplement (doi:10.1039/d3nr05677e), 2023-12-27

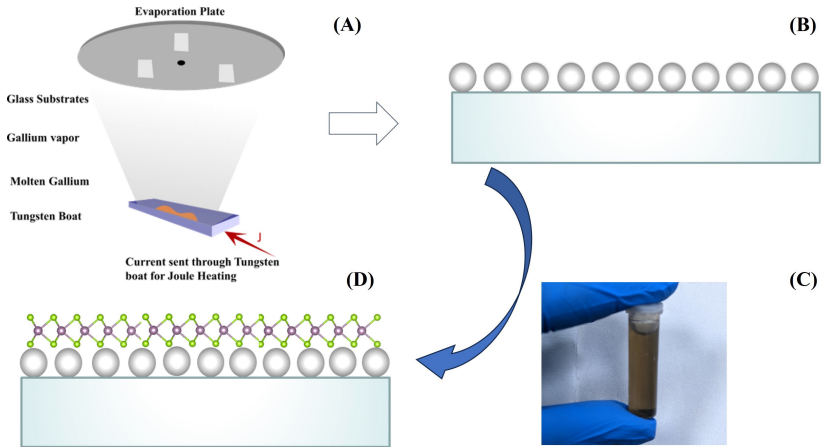

Supplement: d3nr05677e2.pdf [file d3nr05677e2.pdf]

(A)

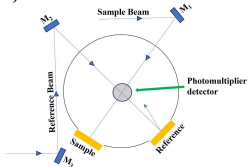

(B)

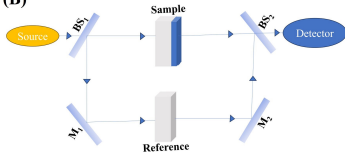

Supplement: d3nr05677e3.pdf [file d3nr05677e3.pdf]

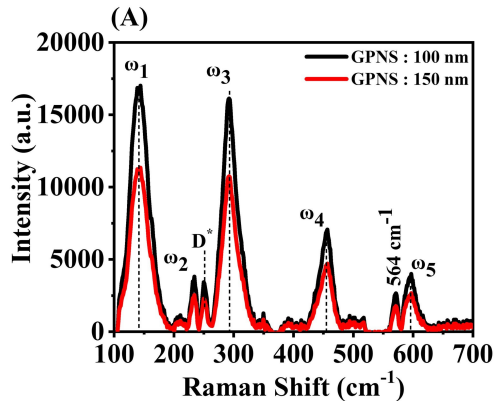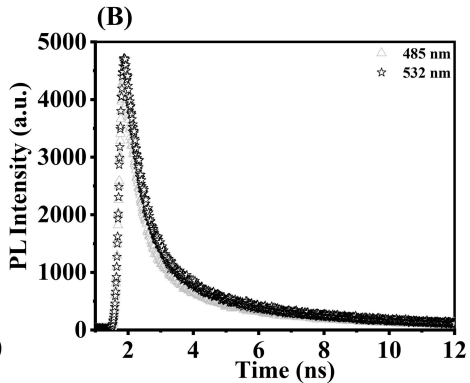

Supplement: d3nr05677e4.pdf [file d3nr05677e4.pdf]

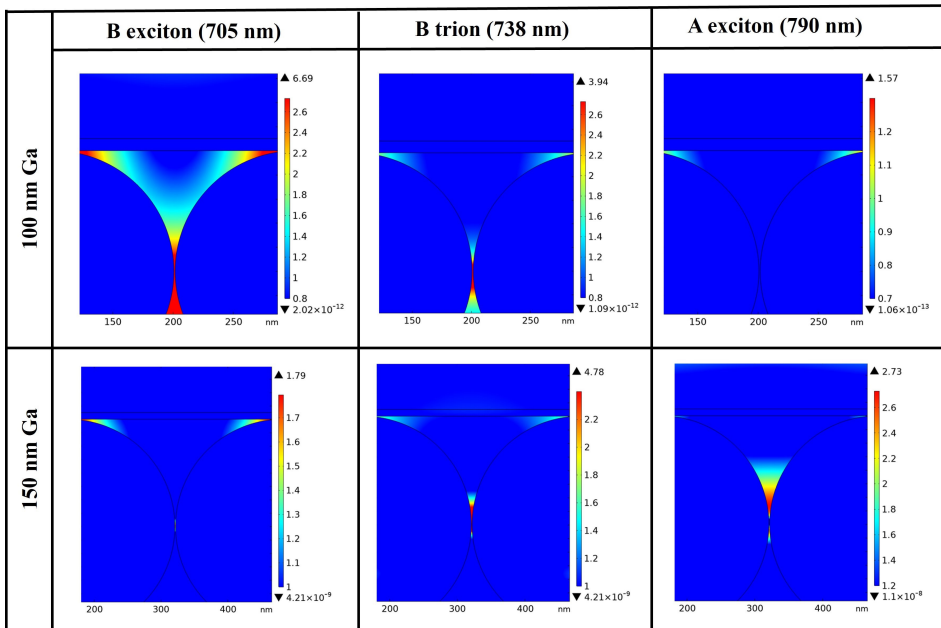

Supplement: d3nr05677e5.pdf [file d3nr05677e5.pdf]

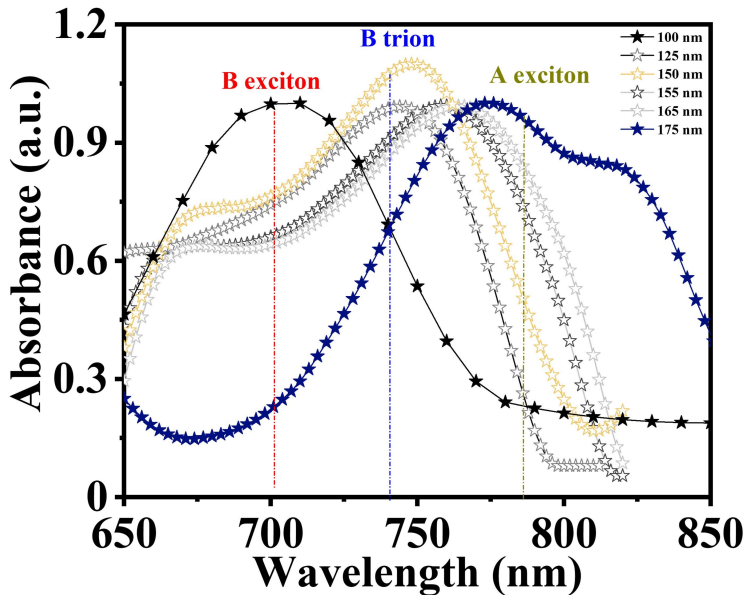

Supplement: d3nr05677e6.pdf [file d3nr05677e6.pdf]
